# Supplementary material for: Invisible photonic prints shown by water
Source: Royal Society of Chemistry journal article supplement (doi:10.1039/c1jm14082e), 2011-11-10
Supplement: c1jm14082e.pdf [file c1jm14082e.pdf]

## Supporting Information

# Invisible Photonic Printings Shown by Water

Ruyang Xuan<sup>a</sup> and Jianping Ge<sup>\*a</sup>

### Original Reflection Spectra for Cycling Experiments in Figure 6

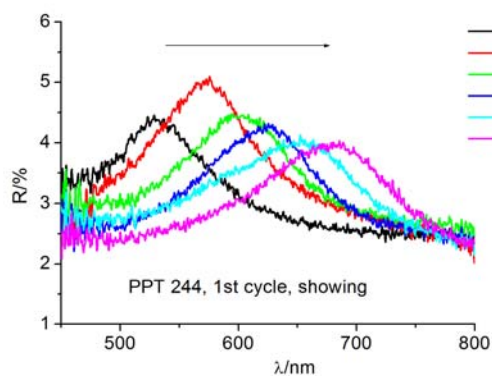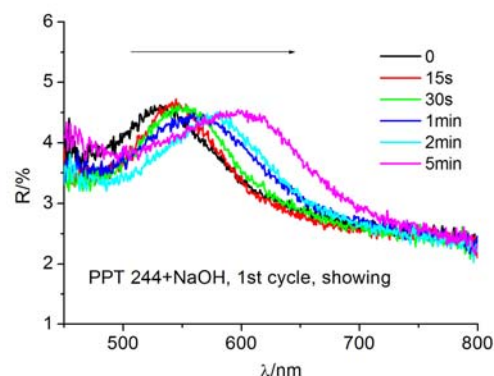

///

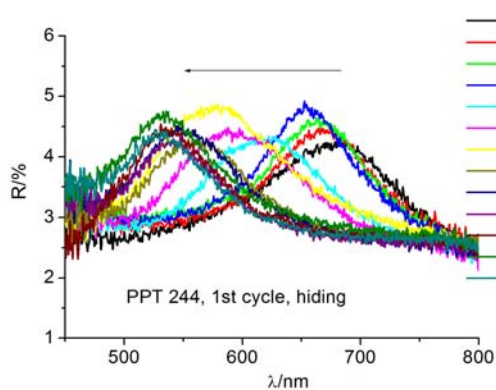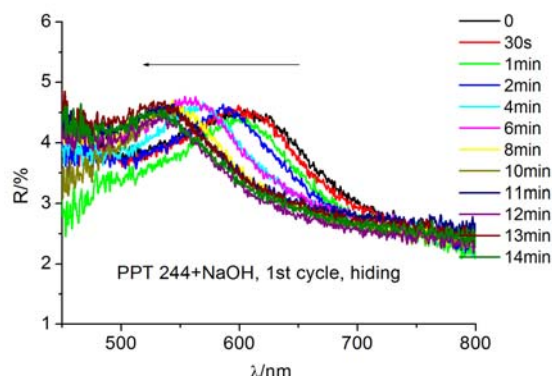

///

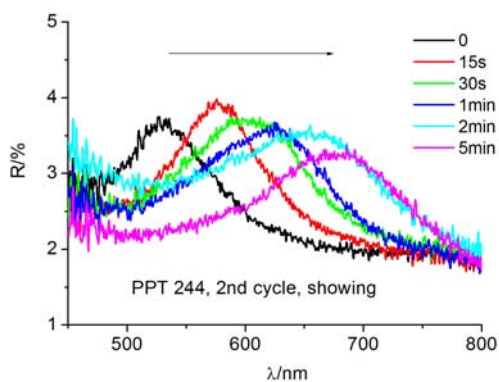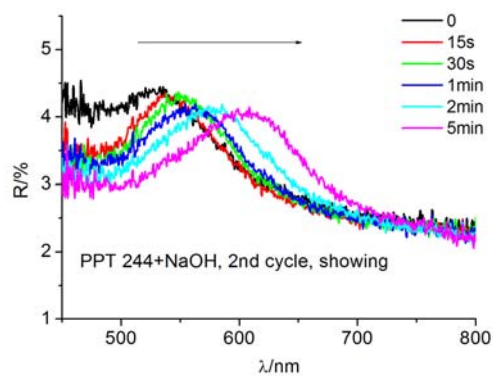

///

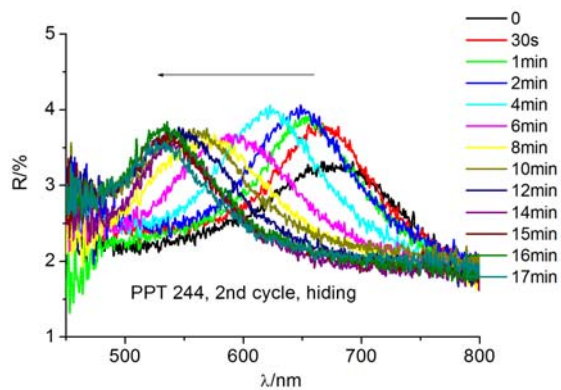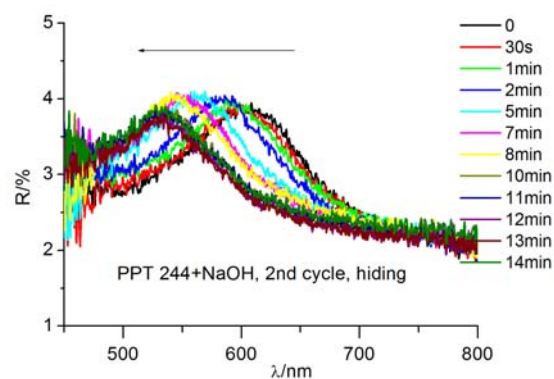

///

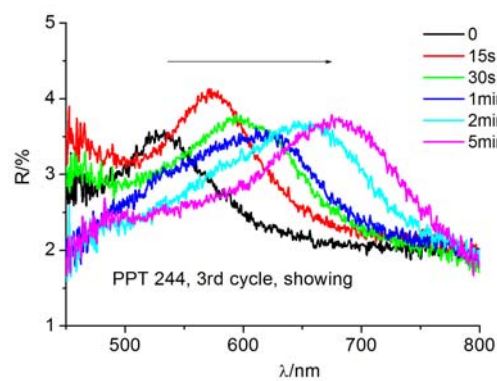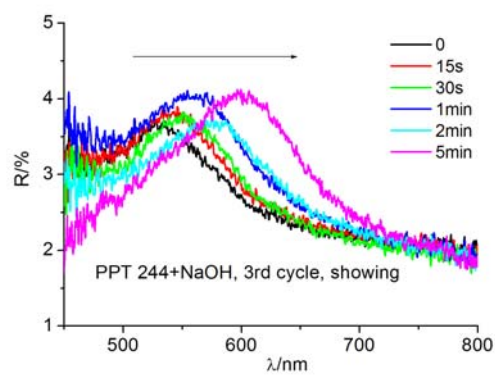

///

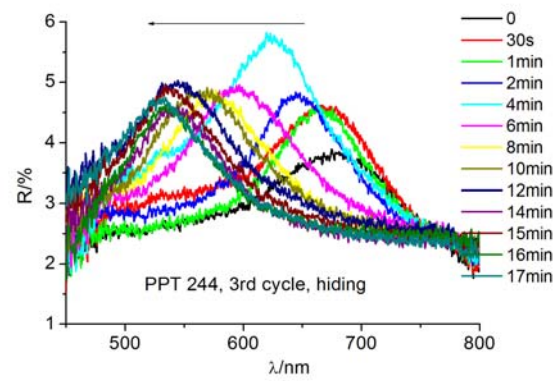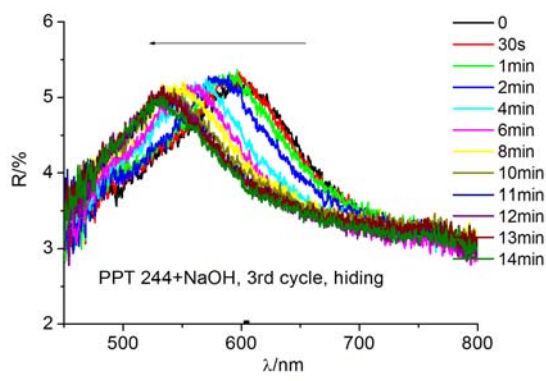

///
